# Supplementary material for: Efficient co-production of EPA and DHA by Schizochytrium sp. via regulation of the polyketide synthase pathway
Source: PubMed Central journal article supplement (PMC9734096; doi:10.1038/s42003-022-04334-4), 2022-12-09
Supplement: 42003_2022_4334_MOESM1_ESM.pdf [file 42003_2022_4334_MOESM1_ESM.pdf]

# **Efficient co-production of EPA and DHA by *Schizochytrium* sp. via regulation of the polyketide synthase pathway**

Wang Ma<sup>1,2</sup>, Meng-Zhen Liu<sup>1</sup>, Zi-Xu Zhang<sup>1</sup>, Ying-Shuang Xu<sup>1</sup>, Peng-Wei Huang<sup>1,2</sup>,  
Dong-Sheng Guo<sup>1</sup>, Xiao-Man Sun<sup>1\*</sup>, He Huang<sup>1,3\*</sup>

<sup>1</sup>School of Food Science and Pharmaceutical Engineering, Nanjing Normal University,  
2 Xuelin Road, Qixia District, Nanjing, China

<sup>2</sup>College of Life Sciences, Nanjing Normal University, 2 Xuelin Road, Qixia District,  
Nanjing, China

<sup>3</sup>College of Biotechnology and Pharmaceutical Engineering, Nanjing Tech University,  
No. 30 South Puzhu Road, Nanjing, China

\*Correspondence: [xiaomansun@njnu.edu.cn](mailto:xiaomansun@njnu.edu.cn); [huangh@njnu.edu.cn](mailto:huangh@njnu.edu.cn)

This PDF file includes:

Tables S1

Figures S1 to S11

**Supplementary Table1.** Primers used in this study.

| Target gene           | Primer | Sequence (5'-3')         |
|-----------------------|--------|--------------------------|
| <i>β-actin</i>        | F      | TGTCCTCACGCTCAAGTA       |
|                       | R      | GAAGGTGTGGTGCCAGAT       |
| <i>Δ9 elongase</i>    | F      | TCCTCTCATTACGCAGTTG      |
|                       | R      | TTCACTATGACTGCGAGC       |
| <i>Δ6 desaturase</i>  | F      | CGAGCATAACAGTTGACAT      |
|                       | R      | AATTGCCAGGTGATTCAT       |
| <i>Δ8 desaturase</i>  | F      | CGCATTCCCTTATATTGTTCT    |
|                       | R      | AACACTGACAACCTGGATT      |
| <i>Δ12 desaturase</i> | F      | ACTTTCTCCCTTACCTTGT      |
|                       | R      | CATACTCACCAAGATGTCC      |
| <i>MetE-like</i>      | F      | TACATTGACTACATTAACCTTCGT |
|                       | R      | GTTCTTGCTGTTGTGAGT       |
| <i>orf A</i>          | F      | CATCAAGGAGAACGAGAC       |
|                       | R      | AGGGAATTTGAACTGCTC       |
| <i>orf B</i>          | F      | GAAGAAGAAGAAGAAGAAGAA    |
|                       | R      | AGATCCGATCCTCAACAAG      |
| <i>orf C</i>          | F      | TCTTGAGACCGTTAATGTAA     |
|                       | R      | CATCGAGAAGCGTATCTT       |
| <i>GPAT1</i>          | F      | ACCGACAAGAATGGAGAA       |
|                       | R      | AGATGAAGATGCTGTTGC       |
| <i>GPAT2</i>          | F      | AACAAGAAGTCAAGAACAT      |
|                       | R      | CGTAGATAGACTGCGTAT       |
| <i>LPAAT1</i>         | F      | ATTGATTACGAAGAGTTCT      |
|                       | R      | CTCAGGAACCATTAACCTT      |
| <i>LPAAT2</i>         | F      | TTACCTTGATCTGATTGA       |
|                       | R      | CTTAACGAGAATATGCTC       |
| <i>LPAAT3</i>         | F      | AAACCCACACCGACAAGA       |
|                       | R      | CAATCCAACCTCCTCATCTTCATA |
| <i>PAP1</i>           | F      | CTTGGAGTATCACAGTGT       |
|                       | R      | GGATGGTTCTTCGTATGG       |
| <i>PAP2</i>           | F      | ATTTCCAGAACCCGATAT       |
|                       | R      | AATCAAGTTATCCTCGGT       |
| <i>PAP3</i>           | F      | CAATTTGACCGCTACTAT       |
|                       | R      | CCATTATCCTTCTCTTGC       |
| <i>DGAT1</i>          | F      | TTCCTCTCGCCAACATAA       |
|                       | R      | AGAAATGGAAATCACTTGGTT    |
| <i>DGAT2</i>          | F      | CAAAGACCACAGCACATC       |
|                       | R      | ATTGTGCTAGGTGTTCTCT      |
| <i>DGAT3</i>          | F      | GTGATCCGTACATTGCTA       |
|                       | R      | GTTAATACGATGACCTCTTG     |

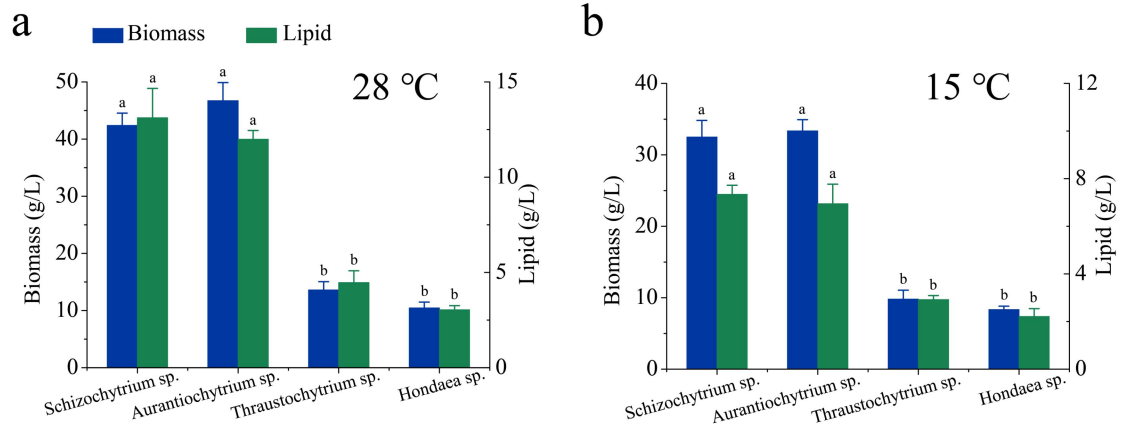

**Supplementary Figure 1. Biomass and lipid accumulation of different thraustochytrid genera under (a) 28°C fermentation conditions and (b) 15 °C fermentation conditions.** Letters above the bars indicate significant difference ( $p \leq 0.05$ ), based on one-way analysis of variance (ANOVA) and Tukey's honestly significant difference (HSD) test. The data shown are the mean  $\pm$  S.D. (n=3).

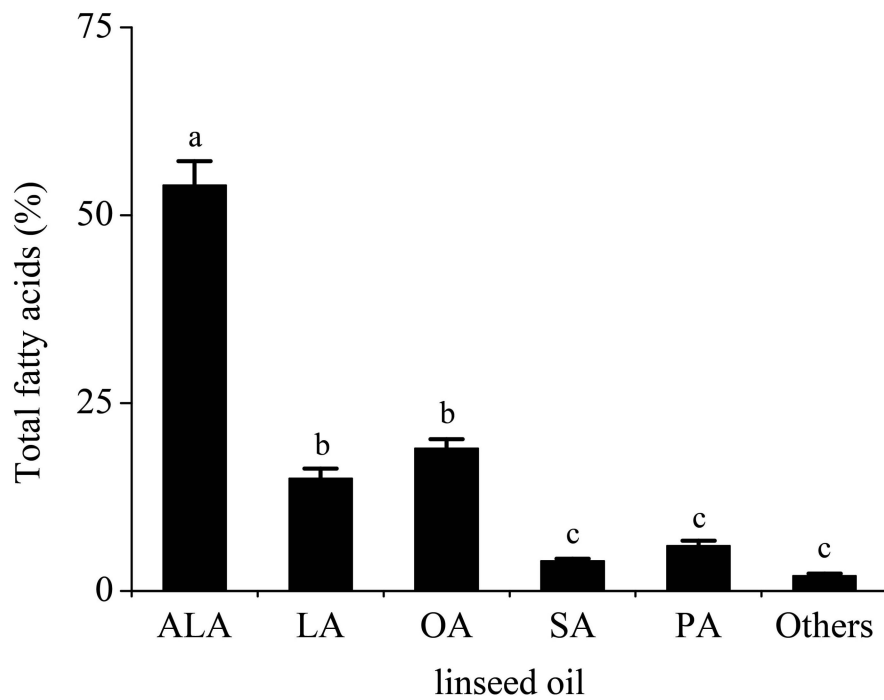

**Supplementary Figure 2. Fatty acid composition of linseed oil.** ALA  $\alpha$ -linolenic acid, LA linoleic acid, OA oleic acid, SA stearic acid, PA palmitic acid. Letters above the bars indicate significant difference ( $p \leq 0.05$ ), based on one-way analysis of variance (ANOVA) and Tukey's honestly significant difference (HSD) test. The data shown are the mean  $\pm$  S.D. (n=3).

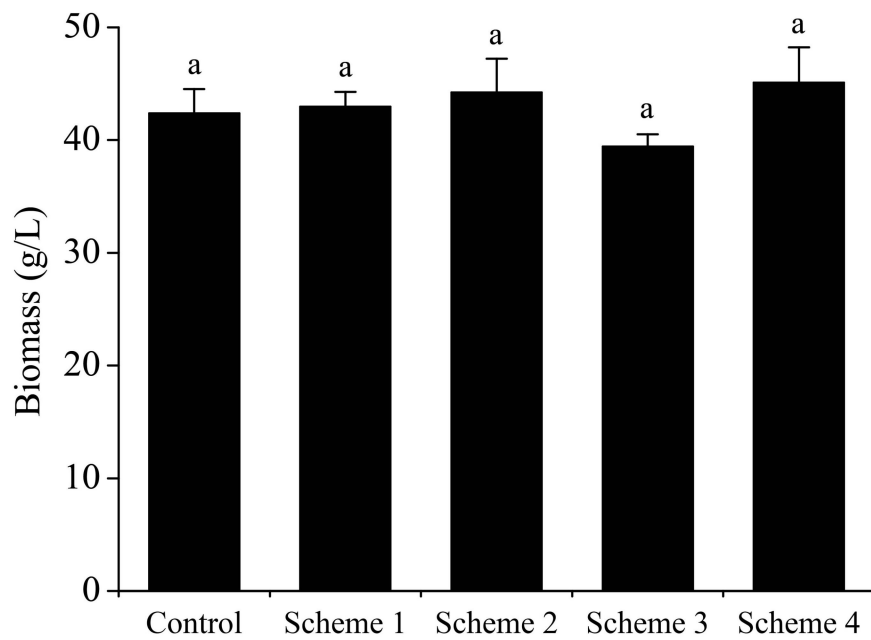

**Supplementary Figure 3. Biomass of Schizochytrium under different adding schemes.** Letters above the bars indicate significant difference ( $p \leq 0.05$ ), based on one-way analysis of variance (ANOVA) and Tukey's honestly significant difference (HSD) test. The data shown are the mean  $\pm$  S.D. (n=3).

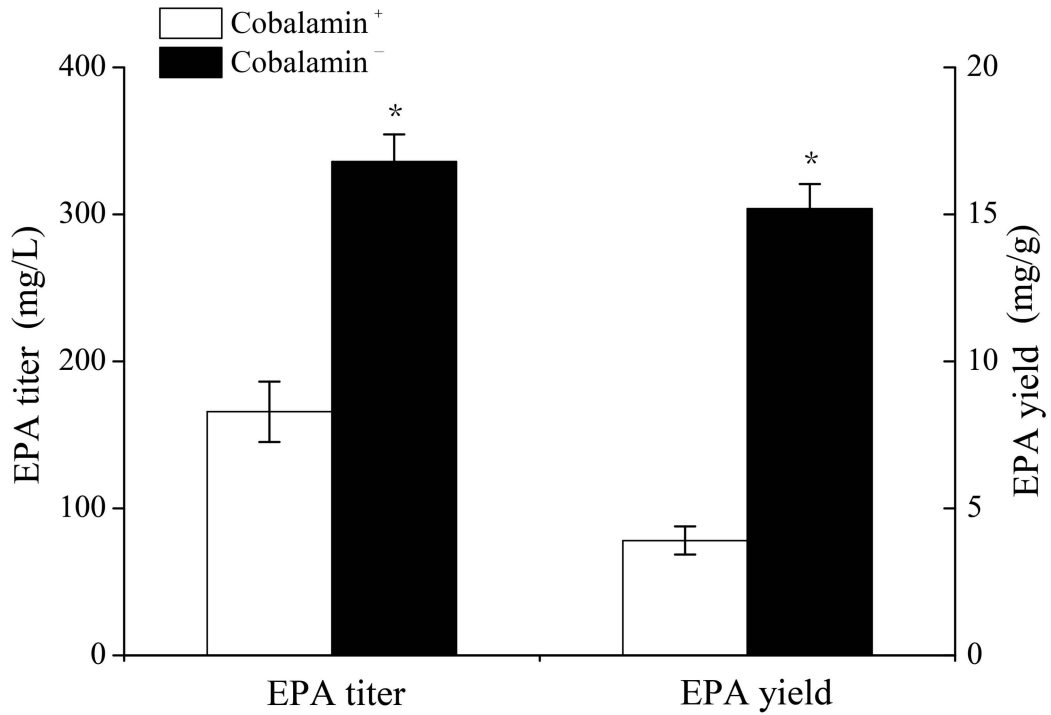

**Supplementary Figure 4. Effects of EPA yield and EPA titer between cobalamin<sup>+</sup> and cobalamin<sup>-</sup> of *Schizochytrium* sp..** The statistical significances of the final results were analyzed by t-test, \* $p < 0.05$ . The data shown are the mean  $\pm$  S.D. (n=3).

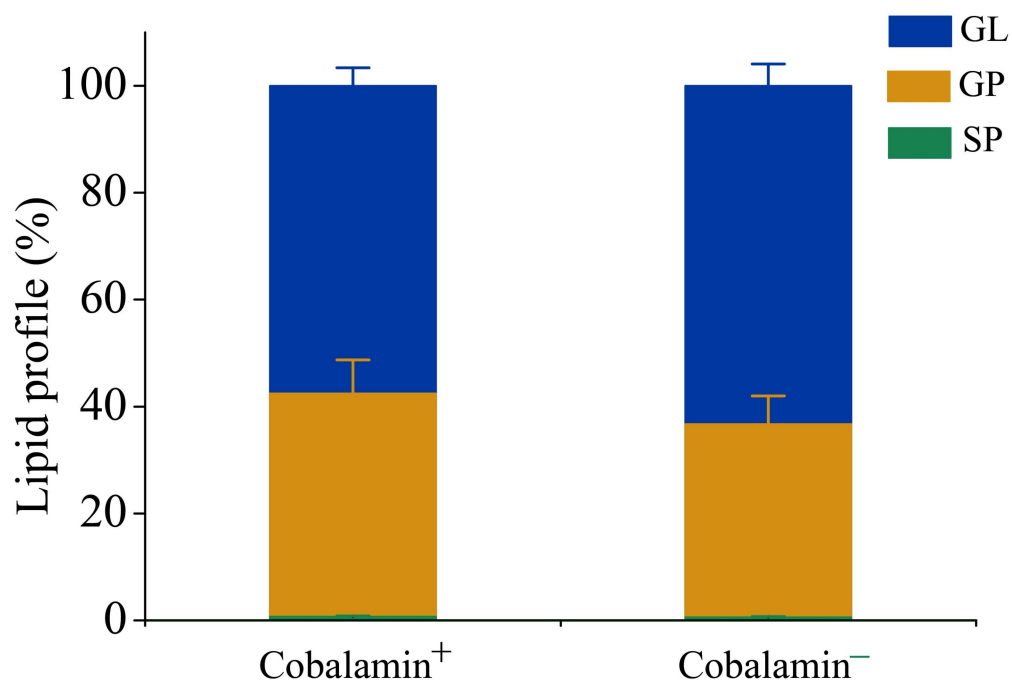

**Supplementary Figure 5. Distribution of fatty acid storage in *Schizochytrium* sp. under different fermentation conditions.** GL Glycerolipids, GP Glycerophospholipids, SP Sphingolipids. The data shown are the mean  $\pm$  S.D. (n=3).

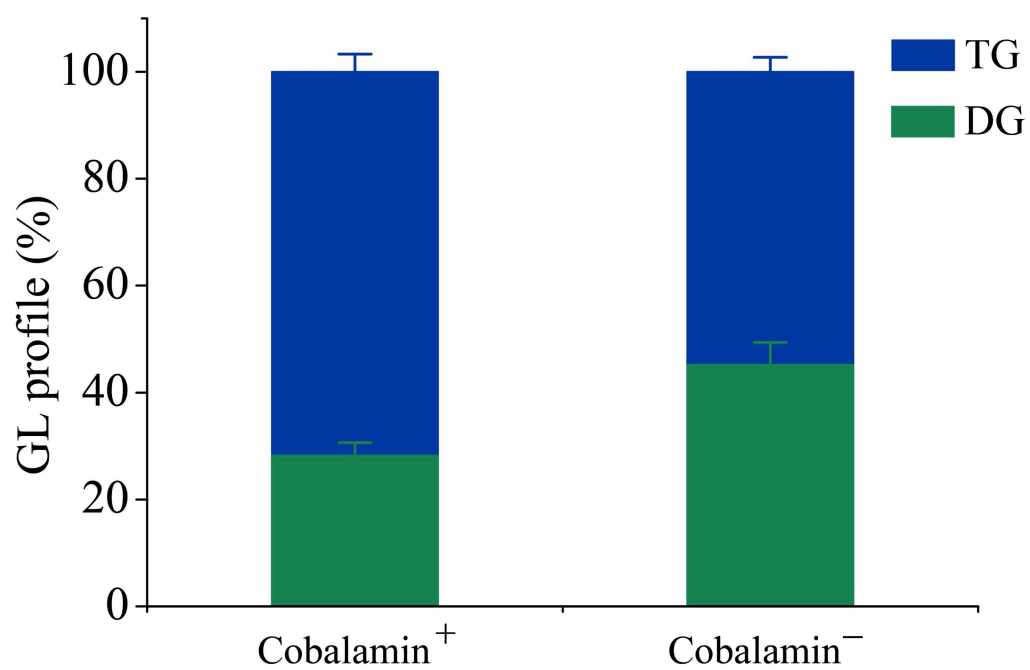

**Supplementary Figure 6. Glycerolipid composition of *Schizochytrium* sp..** TG Triradylglycerols, DG Diradylglycerols. The data shown are the mean  $\pm$  S.D. (n=3).



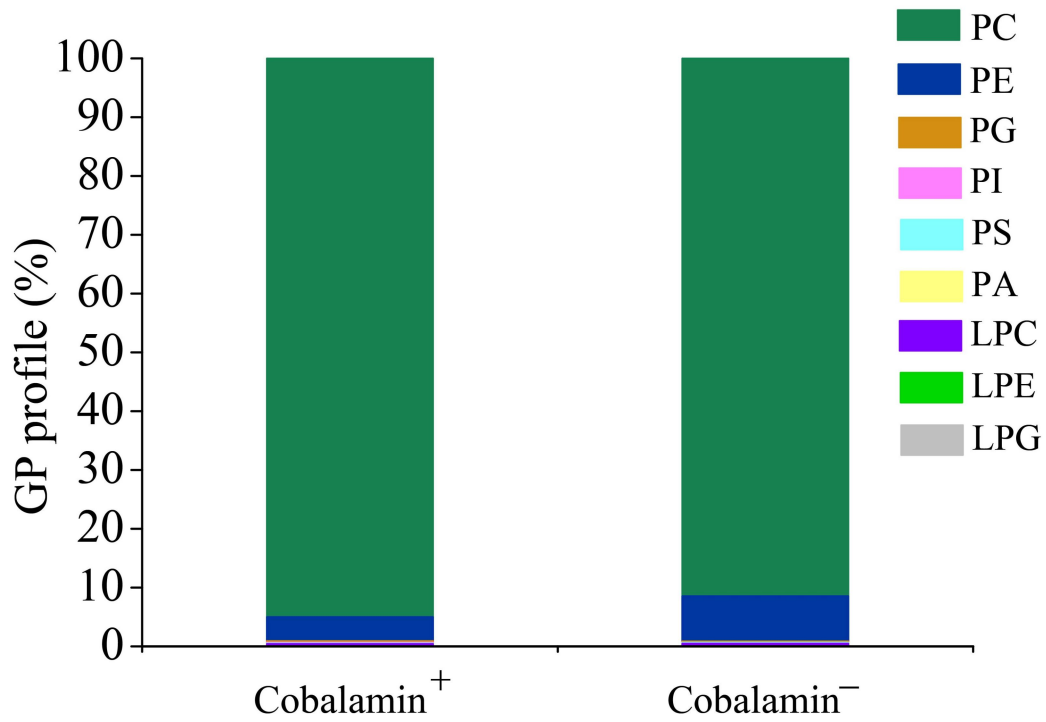

**Supplementary Figure 7. Glycerophospholipid composition of *Schizochytrium* sp..**

PC phosphocholines, PE phosphoethanolamines, PG phosphoglycerols, PI phosphoinositols, PS phosphoserines, PA phosphates, LPC lysophosphatidylcholine, LPE lysophosphatidylethanolamine, LPG lysophosphatidylglycerol. The statistical significances of the final results were analyzed by t-test, \* $p < 0.05$ .

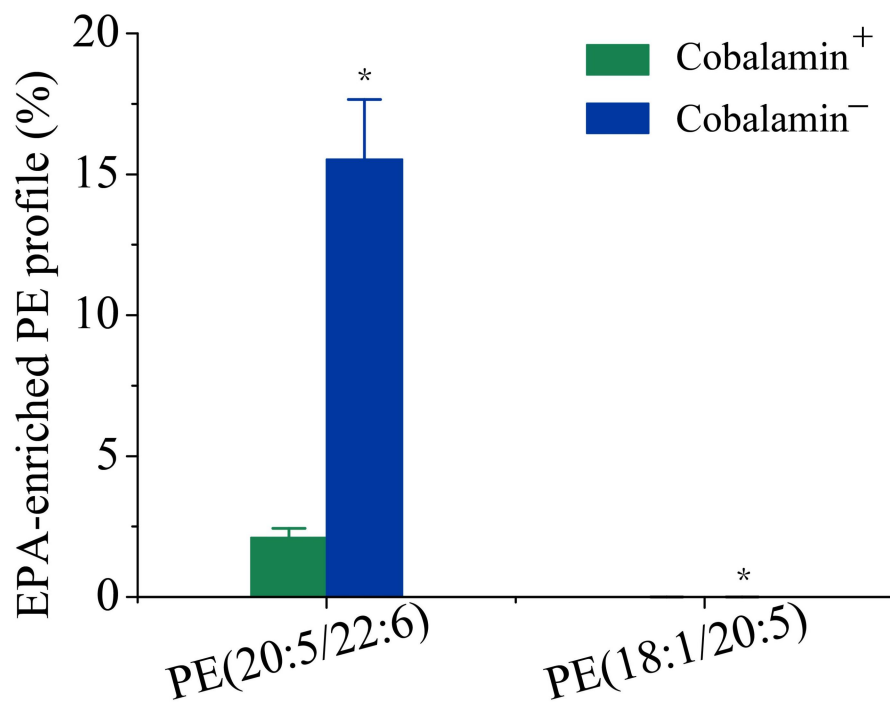

**Supplementary Figure 8. EPA-enriched PE profile in *Schizochytrium* sp.(60 h).**

The statistical significances of the final results were analyzed by t-test,  $*p < 0.05$ . The

data shown are the mean  $\pm$  S.D. (n=3).

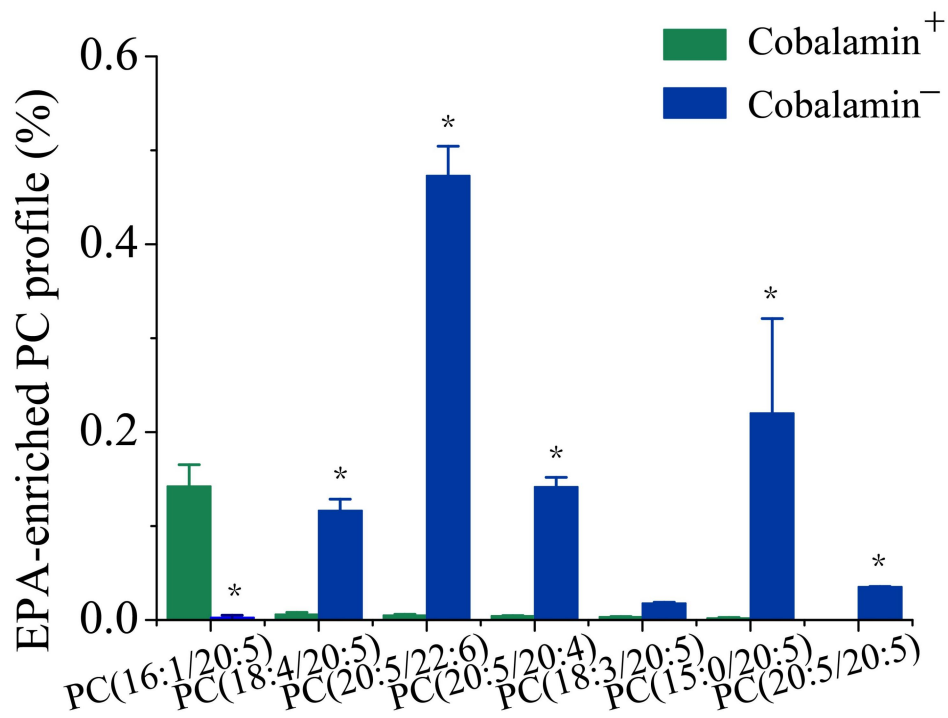

**Supplementary Figure 9. EPA-enriched PC profile in *Schizochytrium* sp.(60 h).**

The statistical significances of the final results were analyzed by t-test, \* $p < 0.05$ . The

data shown are the mean  $\pm$  S.D. (n=3).

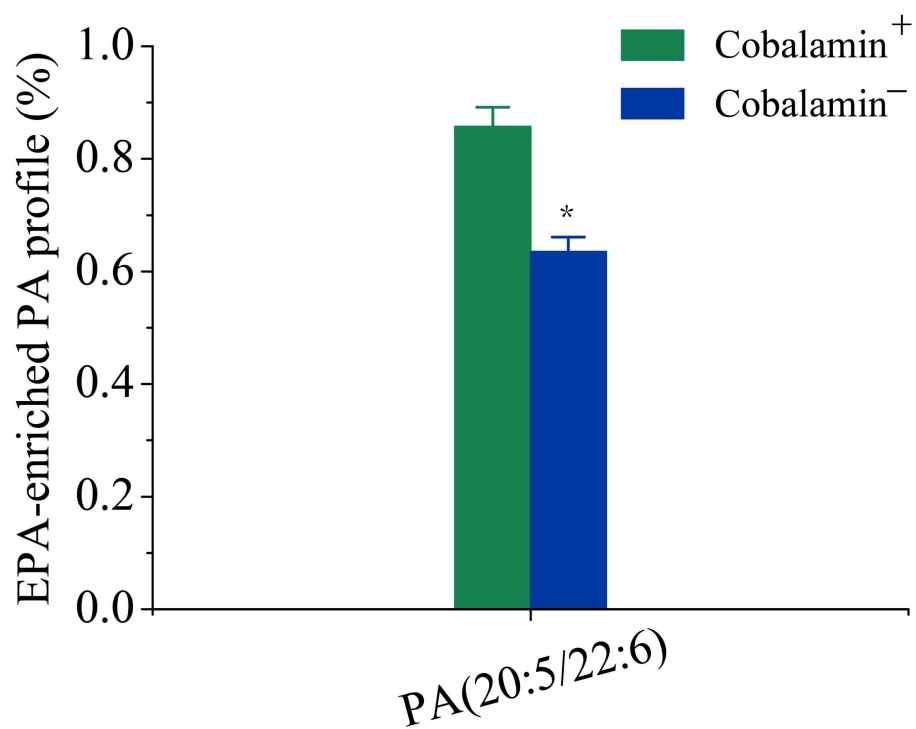

**Supplementary Figure 10. EPA-enriched PA profile in *Schizochytrium* sp.(60 h).**

The statistical significances of the final results were analyzed by t-test, \* $p < 0.05$ . The

data shown are the mean  $\pm$  S.D. (n=3).

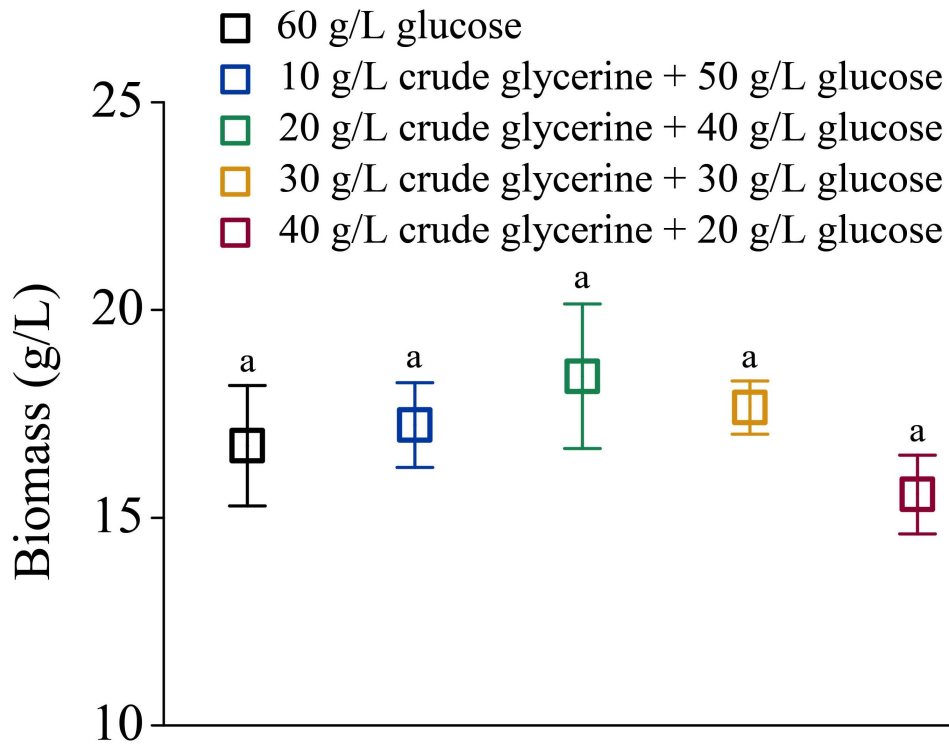

**Supplementary Figure 11. Effects of mixed carbon sources of different proportions of crude glycerol and glucose on the Biomass of *Schizochytrium* sp..** Letters above the bars indicate significant difference ( $p \leq 0.05$ ), based on one-way analysis of variance (ANOVA) and Tukey's honestly significant difference (HSD) test. The data shown are the mean  $\pm$  S.D. (n=3).
