# Supplementary material for: Efficient co-production of EPA and DHA by Schizochytrium sp. via regulation of the polyketide synthase pathway
Source: PubMed Central journal article supplement (PMC9734096; doi:10.1038/s42003-022-04334-4), 2022-12-09
Supplement: 42003_2022_4334_MOESM2_ESM.pdf [file 42003_2022_4334_MOESM2_ESM.pdf]

## **Description of Additional Supplementary Files**

File name: Supplementary Data 1-11

Description: Source data used to generate Supplementary figure 1-11.

File name: Supplementary Data 2

Description: source data used to generate figure 1-6.
